# Supplementary material for: Caregiver Perspective of Benefits and Side Effects of Anti-Seizure Medications in CDKL5 Deficiency Disorder from an International Database
Source: PubMed Central journal article supplement — CNS Drugs. 2024 Jul 26;38(9):719–32. doi: 10.1007/s40263-024-01105-z (PMC11316688; doi:10.1007/s40263-024-01105-z), 2024-07-26
Supplement: 40263_2024_1105_MOESM1_ESM.pdf [file 40263_2024_1105_MOESM1_ESM.pdf]

# Caregiver Perspective of Benefits and Side Effects of Anti-seizure Medications in CDKL5 Deficiency Disorder from an International Database

## Journal

*CNS Drugs*

## Authors

Kingsley Wong<sup>1</sup>, Mohammed Junaid<sup>1</sup>, Solomon Alexander<sup>1</sup>, Heather E. Olson<sup>2</sup>, Elia M. Pestana-Knight<sup>3</sup>, Rajsekar R. Rajaraman<sup>4</sup>, Jenny Downs<sup>1</sup>, Helen Leonard<sup>1</sup>

## Affiliations

1. Telethon Kids Institute, Centre for Child Health Research, The University of Western Australia, Perth, WA, Australia.
2. Division of Epilepsy and Clinical Neurophysiology and Epilepsy Genetics Program, Department of Neurology, Boston Children's Hospital, Boston, MA, USA.
3. Cleveland Clinic, Neurological Institute, Cleveland, OH, USA.
4. UCLA Mattel Children's Hospital, Los Angeles, CA, USA.

## Corresponding Author

A/Prof. Helen Leonard

Email: [Helen.Leonard@telethonkids.org.au](mailto:Helen.Leonard@telethonkids.org.au)

**Supplementary Table 1. Likelihood of any seizure-related benefits and worsening and any side effects associated with the use of antiseizure medications in 399 individuals with CDD**

| <b>Antiseizure medication</b> | <b>n</b> | <b>Any benefits</b>   | <b>Any worsening</b> | <b>Any side effects</b> |
|-------------------------------|----------|-----------------------|----------------------|-------------------------|
|                               |          | %, number of events/n |                      |                         |
| Cannabidiol                   | 70       | 80, 45/56             | 4, 2/56              | 13, 9/68                |
| Carbamazepine                 | 84       | 22, 9/41              | 5, 2/41              | 24, 17/72               |
| Clobazam                      | 219      | 46, 72/156            | 3, 5/156             | 50, 102/205             |
| Clonazepam                    | 132      | 48, 43/89             | 3, 3/89              | 38, 47/123              |
| Clorazepate                   | 13       | 50, 4/8               | 13, 1/8              | 17, 2/12                |
| Ethosuximide                  | 22       | 13, 1/8               | 0, 0/8               | 28, 5/18                |
| Felbamate                     | 31       | 40, 8/20              | 5, 1/20              | 33, 10/30               |
| Gabapentin                    | 17       | 40, 4/10              | 0, 0/10              | 6, 1/16                 |
| Steroids/ACTH                 | 135      | 49, 42/86             | 5, 4/86              | 65, 84/129              |
| Lacosamide                    | 49       | 48, 16/33             | 3, 1/33              | 35, 16/46               |
| Lamotrigine                   | 135      | 52, 46/89             | 7, 6/89              | 24, 29/122              |
| Levetiracetam                 | 347      | 39, 90/231            | 2, 5/231             | 32, 102/321             |
| Nitrazepam                    | 21       | 44, 4/9               | 0, 0/9               | 28, 5/18                |
| Oxcarbazepine                 | 96       | 34, 20/59             | 8, 5/59              | 20, 18/88               |
| Perampanel                    | 31       | 62, 16/26             | 4, 1/26              | 42, 11/26               |
| Phenobarbital                 | 213      | 34, 43/127            | 2, 2/127             | 52, 103/199             |
| Phenytoin                     | 42       | 32, 8/25              | 4, 1/25              | 37, 13/35               |
| Rufinamide                    | 69       | 37, 19/52             | 6, 3/52              | 34, 21/62               |
| Sulthiame                     | 10       | -                     | -                    | 10, 1/10                |
| Topiramate                    | 264      | 49, 77/158            | 6, 9/158             | 38, 94/249              |
| Sodium valproate              | 291      | 53, 102/194           | 1, 2/194             | 31, 82/266              |
| Vigabatrin                    | 243      | 56, 95/170            | 2, 4/170             | 37, 81/220              |
| Zonisamide                    | 105      | 48, 35/73             | 5, 4/73              | 31, 31/99               |

n, number of uses; ACTH, adrenocorticotrophic hormone

**Supplementary Table 2. Encoded family provided comments on seizure-related benefits and worsening and medication side effects associated with the use of Cannabidiol and Perampanel**

|                                              | Number of events |
|----------------------------------------------|------------------|
| <b>Cannabidiol</b>                           |                  |
| Benefits                                     |                  |
| Cognitive improvements                       | 1                |
| Decreased seizure frequency                  | 8                |
| Decreased seizure frequency and severity     | 3                |
| Decreased seizure severity                   | 4                |
| Decreased seizure severity and spasms        | 1                |
| General improvement in seizure control       | 2                |
| Immediate reduction in seizures              | 1                |
| Improved control of tonic-clonic seizures    | 1                |
| Improved sleep                               | 1                |
| Major improvement in seizure control         | 3                |
| More sociable                                | 1                |
| Overall improvement                          | 1                |
| Reduced seizure duration                     | 1                |
| Worsening                                    |                  |
| Worsening of seizure                         | 1                |
| More frequency seizure                       | 1                |
| Side effects                                 |                  |
| Increased appetite and bowel motions         | 1                |
| Drowsiness and fatigue                       | 1                |
| Sleepiness and fatigue                       | 5                |
| Vomiting                                     | 1                |
| Vomiting and nausea                          | 1                |
| <b>Perampanel</b>                            |                  |
| Benefits                                     |                  |
| Decreased seizure frequency                  | 2                |
| Decreased seizure severity                   | 4                |
| General improvement in seizure control       | 1                |
| Side effects                                 |                  |
| Initial drowsiness, fatigue and over-excited | 1                |
| Initial fatigue                              | 1                |
| Initial irritability                         | 1                |
| Screaming                                    | 1                |
| Sleepiness and fatigue                       | 6                |
| Vomiting                                     | 1                |

**Supplementary Table 3. Frequency distribution of antiseizure medications currently used<sup>a</sup>, by concurrent usage status, in 379 individuals with CDD**

|                               | <b>Polytherapy</b> | <b>Monotherapy</b> |
|-------------------------------|--------------------|--------------------|
| <i>n</i>                      | 1,111              | 95                 |
| <b>Antiseizure medication</b> | <i>n</i> (%)       |                    |
| Sodium valproate              | 152 (13.7)         | 16 (16.8)          |
| Levetiracetam                 | 144 (13.0)         | 12 (12.6)          |
| Clobazam                      | 130 (11.7)         | 7 (7.4)            |
| Vigabatrin                    | 124 (11.2)         | 8 (8.4)            |
| Topiramate                    | 108 (9.7)          | 14 (14.7)          |
| Lamotrigine                   | 65 (5.9)           | 9 (9.5)            |
| Clonazepam                    | 58 (5.2)           | 1 (1.1)            |
| Cannabidiol                   | 57 (5.1)           | 4 (4.2)            |
| Zonisamide                    | 49 (4.4)           | 2 (2.1)            |
| Phenobarbital                 | 47 (4.2)           | 4 (4.2)            |
| Rufinamide                    | 32 (2.9)           | 4 (4.2)            |
| Lacosamide                    | 25 (2.3)           | 2 (2.1)            |
| Oxcarbazepine                 | 23 (2.1)           | 2 (2.1)            |
| Perampanel                    | 21 (1.9)           | 2 (2.1)            |
| Carbamazepine                 | 18 (1.6)           | 3 (3.2)            |
| Corticosteroids/ACTH          | 13 (1.2)           | 0 (0)              |
| Felbamate                     | 12 (1.1)           | 2 (2.1)            |
| Nitrazepam                    | 10 (0.9)           | 0 (0)              |
| Clorazepate                   | 9 (0.8)            | 1 (1.1)            |
| Gabapentin                    | 5 (0.5)            | 1 (1.1)            |
| Ethosuximide                  | 4 (0.4)            | 0 (0)              |
| Phenytoin                     | 4 (0.4)            | 1 (1.1)            |
| Sulthiame                     | 1 (0.1)            | 0 (0)              |

<sup>a</sup> currently used at the time of the baseline and/or the follow-up questionnaire  
*n*, number of uses; ACTH, adrenocorticotrophic hormone

**Supplementary Table 4. Likelihood of any seizure-related benefits and any side effects associated with selected<sup>a</sup> concurrent antiseizure medications currently used<sup>b</sup> in 379 individuals with CDD**

| ASM combination |                 |                 | n  | Any benefits<br>%, number of events/n | Any side effects<br>n | Seizure frequency <sup>c</sup> |        |          |        |
|-----------------|-----------------|-----------------|----|---------------------------------------|-----------------------|--------------------------------|--------|----------|--------|
| 1 <sup>st</sup> | 2 <sup>nd</sup> | 3 <sup>rd</sup> |    |                                       |                       | Sz Free                        | Mild   | Moderate | Severe |
|                 |                 |                 |    |                                       |                       | n (%)                          |        |          |        |
| LEV             | TPM             |                 | 13 | 75, 6/8                               | 13                    | 1 (8)                          | 5 (38) | 6 (46)   | 1 (8)  |
| LEV             | VGB             |                 | 13 | 78, 7/9                               | 10                    | 0 (0)                          | 2 (20) | 4 (40)   | 4 (40) |
| VPA             | CLB             |                 | 13 | 63, 5/8                               | 12                    | 0 (0)                          | 3 (25) | 2 (17)   | 7 (58) |
| VPA             | VGB             |                 | 11 | 75, 6/8                               | 10                    | 0 (0)                          | 3 (30) | 4 (40)   | 3 (30) |
| VPA             | LTG             |                 | 7  | 83, 5/6                               | 6                     | 0 (0)                          | 2 (33) | 3 (50)   | 1 (17) |
| LEV             | ZNS             |                 | 7  | 100, 6/6                              | 7                     | 0 (0)                          | 3 (43) | 3 (43)   | 1 (14) |
| VGB             | TPM             |                 | 7  | 100, 4/4                              | 7                     | 0 (0)                          | 1 (14) | 5 (71)   | 1 (14) |
| VPA             | LEV             |                 | 6  | 100, 5/5                              | 6                     | 1 (17)                         | 1 (17) | 4 (67)   | 0 (0)  |
| VPA             | TPM             |                 | 6  | 67, 2/3                               | 5                     | 0 (0)                          | 2 (40) | 3 (60)   | 0 (0)  |
| VGB             | ZNS             |                 | 6  | 67, 4/6                               | 5                     | 0 (0)                          | 2 (40) | 2 (40)   | 1 (20) |
| CLB             | TPM             |                 | 6  | 80, 4/5                               | 6                     | 0 (0)                          | 1 (17) | 5 (83)   | 0 (0)  |
| CLB             | ZNS             |                 | 5  | 100, 5/5                              | 5                     | 0 (0)                          | 0 (0)  | 3 (60)   | 2 (40) |
| VPA             | CLN             |                 | 5  | 33, 1/3                               | 5                     | 1 (20)                         | 2 (40) | 1 (20)   | 1 (20) |
| LEV             | OXC             |                 | 4  | 66, 2/3                               | 4                     | 0 (0)                          | 3 (75) | 1 (25)   | 0 (0)  |
| LEV             | CLB             |                 | 4  | 100, 1/1                              | 4                     | 1 (25)                         | 2 (50) | 0 (0)    | 1 (25) |
| VGB             | CLN             |                 | 4  | 100, 2/2                              | 4                     | 0 (0)                          | 1 (25) | 1 (25)   | 2 (50) |
| LEV             | VPA             | VGB             | 6  | 75, 3/4                               | 4                     | 0 (0)                          | 0 (0)  | 2 (50)   | 2 (50) |
| LEV             | VPA             | CLB             | 6  | 100, 4/4                              | 4                     | 0 (0)                          | 2 (33) | 2 (33)   | 2 (33) |

<sup>a</sup> limited to dual or triple therapy used by at least 4 uses; <sup>b</sup> currently used at the time of the baseline and/or the follow-up questionnaire; <sup>c</sup> seizure frequency: Sz Free, seizure-free for at least 2 months; mild, weekly or less; moderate, 1-4 per day; severe, at least 5 per day  
n, number of uses; ASM, antiseizure medication; LEV, levetiracetam; TPM, topiramate; VGB, vigabatrin; VPA, sodium valproate; CLB, clobazam; LTG, lamotrigine; ZNS, zonisamide; OXC, oxcarbazepine; CLN, clonazepam
